# Supplementary material for: Global mean nitrogen recovery efficiency in croplands can be enhanced by optimal nutrient, crop and soil management practices
Source: PubMed Central journal article supplement (PMC10505174; doi:10.1038/s41467-023-41504-2), 2023-09-16
Supplement: 41467_2023_41504_MOESM1_ESM.pdf [file 41467_2023_41504_MOESM1_ESM.pdf]

## Supplementary Information

### **Global mean nitrogen recovery efficiency in croplands can be enhanced by optimal nutrient, crop and soil management practices**

Luncheng You<sup>1</sup>, Gerard H. Ros<sup>2</sup>, Yongliang Chen<sup>1,\*</sup>, Qi Shao<sup>1</sup>, Madaline D. Young<sup>2</sup>, Fusuo Zhang<sup>1</sup> & Wim de Vries<sup>2</sup>

<sup>1</sup>College of Resources and Environmental Sciences, National Academy of Agriculture Green Development, Key Laboratory of Plant–Soil Interactions, Ministry of Education, State Key Laboratory of Nutrient Use and Management, China Agricultural University, 100193, Beijing, China

<sup>2</sup>Wageningen University and Research, Environmental Systems Analysis Group, P.O. Box 47, 6700AA Wageningen, the Netherland

\*Corresponding author: Yongliang Chen.

E-mail: [ylchen@cau.edu.cn](mailto:ylchen@cau.edu.cn).

18 **Contents**

19 **Supplementary Note 1** The detailed search terms on the Web of Science database.

20 ***Supplementary tables:***

21 **Supplementary Table 1** Summary of 29 meta-analytical publications combined for further  
22 analysis in this study.

23 **Supplementary Table 2** Description of the nutrient, crop and soil management variables used  
24 in the meta-model of existing meta-analytical regression models and the meta-regression of the  
25 underlying primary studies.

26 **Supplementary Table 3** Overview of data collected of the primary studies.

27 **Supplementary Table 4** Summary statistics of the nitrogen recovery efficiency in control and  
28 treated plots, the N dose, soil properties and climate variables in the investigated sites of the  
29 primary studies.

30 **Supplementary Table 5** Relative and absolute changes in N recovery efficiency (NUEr) in  
31 response to management practices (meta-analytical data vs. primary data) relative to a reference  
32 practice.

33 **Supplementary Table 6** Main factor analysis of the contribution of management practices and  
34 site conditions on the variation in N recovery efficiency (NUEr) based on the primary studies,  
35 as derived by three models (ROM, MD and SMD methods).

36 **Supplementary Table 7** Parameter estimates for the contribution of management practices and  
37 site conditions on the variation in NUEr based on the primary studies derived by three models  
38 (ROM, MD and SMD methods) with corresponding standard errors, *p*-values and 95%  
39 confidence intervals (CI).

40 ***Supplementary figures:***

41 **Supplementary Fig. 1** PRISMA Flow diagram showing the selection process of studies  
42 included in the analysis.

43 **Supplementary Fig. 2** Frequency distribution histogram of MAT (a), MAP (b), clay (c), SOC  
44 (d), pH (e), and N rate (f).

45 **Supplementary Fig. 3** Data fitting and correlation coefficients among MAT, MAP, clay, SOC,  
46 pH, N rate and crop type.

47 **Supplementary Fig. 4** Mean effects of nutrient (a), crop (b) and soil (c) management practices,  
48 based on original source data of meta-analyses (circles), on the relative change in N recovery  
49 efficiency (%) as affected by site conditions in comparison to the overall mean impact (solid  
50 line).

51 **Supplementary Fig. 5** Upscaled results for global impacts of management practices on changes

52 in absolute N recovery efficiency (%) based on the MD model.

53

54 **Supplementary Note 1** The detailed search terms that were used on the Web of Science  
55 database were:

56 TS = ((rotation cropping OR crop rotation OR crop diversification OR double cropping OR  
57 intercropping OR multi-cropping OR cover cropping OR cover crop OR catch cropping OR  
58 legume in rotation OR crop residues OR reduced tillage OR minimal tillage OR strip till OR  
59 zone till OR ridge till OR no tillage OR organic fertilizer OR manure OR combined fertilizer  
60 OR fertilizer rate OR fertilizer timing OR fertilizer placement OR enhanced efficiency fertilizer  
61 OR biofertilizer) AND (nitrogen use efficiency OR NUE OR N uptake OR crop N content)  
62 AND meta-analysis)

63

64 **Supplementary Table 1** Summary of 29 meta-analytical publications combined for further analysis in this study.

| Study                     | Geographic coverage | Crop type          | Nutrient management            |                     |                    |                            |                       | Crop management         |                   |                | Soil management |              | Response variable |                 |
|---------------------------|---------------------|--------------------|--------------------------------|---------------------|--------------------|----------------------------|-----------------------|-------------------------|-------------------|----------------|-----------------|--------------|-------------------|-----------------|
|                           |                     |                    | Enhanced efficiency fertilizer | Combined fertilizer | Organic fertilizer | Right fertilizer placement | Right fertilizer rate | Right fertilizer timing | Residue retention | Cover cropping | Crop rotation   | Zero tillage |                   | Reduced tillage |
| Abalos et al. 2014        | Global              | maize, wheat, rice | √                              |                     |                    |                            |                       |                         |                   |                |                 |              |                   | N uptake, NUEr  |
| Burzaco et al. 2014       | Global              | maize              | √                              |                     |                    |                            |                       |                         |                   |                |                 |              |                   | N uptake, NUEr  |
| Chivenge et al. 2011      | Sub-Saharan Africa  | maize              |                                | √                   | √                  |                            |                       |                         |                   |                |                 |              |                   | NUEr            |
| Ding et al. 2018          | China               | rice               | √                              |                     | √                  |                            |                       |                         | √                 |                |                 |              |                   | NUEr            |
| Fernandez et al 2020      | Global              | wheat              |                                |                     |                    |                            |                       | √                       |                   |                |                 |              |                   | NUEr            |
| Gardner & Drinkwater 2009 | Global              | maize, wheat       | √                              |                     | √                  | √                          | √                     | √                       |                   |                | √               |              |                   | N uptake, NUEr  |
| Jiang et al. 2021         | Global              | rice               | √                              |                     |                    |                            |                       |                         |                   |                |                 |              |                   | NUEr            |
| Li et al. 2019            | Global              | maize              |                                |                     |                    |                            | √                     |                         |                   |                |                 |              |                   | NUEr            |
| Liang et al. 2016         | Global              | rice               |                                |                     |                    |                            |                       |                         |                   |                |                 | √            |                   | N uptake, NUEr  |
| Linquist et al. 2013      | Global              | rice               | √                              |                     |                    |                            |                       |                         |                   |                |                 |              |                   | N uptake        |
| Liu et al. 2020           | China               | wheat              |                                |                     |                    |                            |                       |                         | √                 |                |                 | √            |                   | N uptake        |
| Liu et al. 2021a          | China               | maize              |                                |                     |                    |                            |                       |                         | √                 |                |                 |              |                   | NUEr            |
| Liu et al. 2021b          | China               | maize, wheat, rice |                                |                     | √                  |                            |                       |                         |                   |                |                 |              |                   | N uptake, NUEr  |
| Nkebiwe et al. 2016       | Global              | maize, wheat, rice |                                |                     |                    | √                          |                       |                         |                   |                |                 |              |                   | N uptake        |
| Qiao et al. 2015          | Global              | maize, wheat, rice | √                              |                     |                    |                            |                       |                         |                   |                |                 |              |                   | N uptake, NUEr  |
| Quan et al. 2021          | Global              | maize              | √                              | √                   | √                  | √                          | √                     | √                       |                   | √              |                 | √            |                   | N uptake, NUEr  |
| Quemada et al. 2013       | Global              | maize, wheat, rice | √                              |                     |                    |                            | √                     | √                       |                   | √              |                 |              |                   | N uptake        |
| Sha et al. 2020           | Global              | maize, wheat, rice | √                              |                     |                    |                            |                       |                         |                   |                |                 |              |                   | N uptake, NUEr  |
| Wang et al. 2018          | Global              | maize, wheat, rice |                                |                     |                    |                            |                       |                         | √                 |                |                 |              |                   | N uptake, NUEr  |

| Study                 | Geographic coverage | Crop type          | Nutrient management            |                     |                    | Crop management            |                       |                         | Soil management   |                |               | Response variable |                |
|-----------------------|---------------------|--------------------|--------------------------------|---------------------|--------------------|----------------------------|-----------------------|-------------------------|-------------------|----------------|---------------|-------------------|----------------|
|                       |                     |                    | Enhanced efficiency fertilizer | Combined fertilizer | Organic fertilizer | Right fertilizer placement | Right fertilizer rate | Right fertilizer timing | Residue retention | Cover cropping | Crop rotation |                   | Zero tillage   |
| Wei et al. 2020       | Global              | maize              |                                | √                   | √                  |                            |                       |                         |                   |                |               |                   | NUEr           |
| Xia et al. 2017a      | China               | maize, wheat, rice | √                              |                     |                    | √                          | √                     | √                       |                   |                |               |                   | N uptake, NUEr |
| Xia et al. 2017b      | Global              | wheat              |                                |                     | √                  |                            |                       |                         |                   |                |               |                   | N uptake       |
| Xia et al. 2018       | Global              | maize, wheat, rice |                                |                     |                    |                            |                       |                         | √                 |                |               |                   | N uptake, NUEr |
| Yang et al. 2016      | Global              | wheat              | √                              |                     |                    |                            |                       |                         |                   |                |               |                   | N uptake       |
| Zavattaro et al. 2015 | Europe              | maize, wheat, rice |                                |                     | √                  |                            |                       |                         | √                 | √              | √             | √                 | N uptake, NUEr |
| Zavattaro et al. 2017 | Europe              | maize, wheat, rice |                                | √                   | √                  |                            |                       |                         |                   |                |               |                   | N uptake, NUEr |
| Zhang et al. 2019     | Global              | maize              | √                              |                     |                    |                            |                       |                         |                   |                |               |                   | NUEr           |
| Zhang et al. 2020     | China               | maize, wheat, rice |                                | √                   | √                  |                            |                       |                         |                   |                |               |                   | NUEr           |
| Zhu et al. 2020       | Global              | maize, wheat, rice | √                              |                     |                    |                            |                       |                         |                   |                |               |                   | N uptake, NUEr |

66 **Supplementary Table 2** Description of the nutrient, crop and soil management variables used  
 67 in the meta-model of existing meta-analytical regression models and the meta-regression of the  
 68 underlying primary studies.

| <b>Management practice name (abbreviation)</b> | <b>Treatment description</b>        | <b>Control</b>                                                                                                                            |                       |
|------------------------------------------------|-------------------------------------|-------------------------------------------------------------------------------------------------------------------------------------------|-----------------------|
| Nutrient management                            | Enhanced efficiency fertilizer (EE) | application of enhanced efficiency fertilizers such as controlled release fertilizer, nitrification inhibitor/urease inhibitor fertilizer | not applied           |
|                                                | Combined fertilizer (CF)            | combined organic and mineral fertilizer                                                                                                   | mineral fertilizer    |
|                                                | Organic fertilizer (OF)             | organic fertilizer, namely from animal waste or compost                                                                                   | mineral fertilizer    |
|                                                | Fertilizer placement (RFP)          | improved/optimized placement of fertilizer                                                                                                | standard placement    |
|                                                | Fertilizer rate (RFR)               | improved/optimized or reduced fertilizer rate                                                                                             | standard rate         |
|                                                | Fertilizer timing (RFT)             | improved/optimized timing of fertilizer application                                                                                       | standard timing       |
| Crop management                                | Residue retention (RES)             | retaining or incorporating crop residues after harvest, mulching                                                                          | removing              |
|                                                | Cover cropping (CC)                 | cover cropping, catch cropping                                                                                                            | no cover crop         |
|                                                | Crop rotation (ROT)                 | two or more than two crops in rotation                                                                                                    | monoculture           |
| Soil management                                | Zero tillage (ZT)                   | no tillage                                                                                                                                | multiple-pass tillage |
|                                                | Reduced tillage (RT)                | reduced or minimal tillage practices such as strip till, zone till ridge till                                                             | multiple-pass tillage |

69

70 **Supplementary Table 3** Overview of data collected of the primary studies.

| <b>Group</b>                            | <b>Variable</b> | <b>Unit</b> | <b>Description</b>                                                |
|-----------------------------------------|-----------------|-------------|-------------------------------------------------------------------|
| study                                   | ID              | -           | unique ID                                                         |
|                                         | reference       | -           | paper reference: firstauthor_year_firstwordoftitle                |
| location                                | lat             | -           | if present: x coordinate of site                                  |
|                                         | lon             | -           | if present: y coordinate of site                                  |
| climate                                 | MAT             | °C          | mean annual temperature                                           |
|                                         | MAP             | mm          | mean annual precipitation                                         |
| site properties                         | SOC             | g/kg        | soil organic carbon content                                       |
|                                         | pH              | -           | soil acidity                                                      |
|                                         | clay            | %           | clay content                                                      |
|                                         | crop_type       | -           | crop                                                              |
| management                              | tillage         | -           | tillage system                                                    |
|                                         | N_dose          | kg N/ha     | total N input (fertilizer and manure) in kg N/ha                  |
|                                         | replication     | -           | number of replicates                                              |
| response variable<br>NUEr treatment     | nuet_type       | -           | REN: recovery efficiency of N (kg (N Grain) kg / (N fertilized)); |
|                                         | nuet_mean       | %           | mean NUER of treatments                                           |
|                                         | nuet_sd         | -           | standard deviation of NUER of treatments                          |
| response variable<br>NUEr control       | nuec_type       | -           | REN: recovery efficiency of N (kg (N Grain) kg / (N fertilized)); |
|                                         | nuec_mean       | %           | mean NUER of control                                              |
|                                         | nuec_sd         | -           | standard deviation of NUER of control                             |
| response variable N<br>uptake treatment | nut_mean        | kg·N/ha     | mean nitrogen uptake of treatment                                 |
|                                         | nut_sd          | -           | standard deviation of N uptake of treatment                       |
| response variable N<br>uptake control   | nuc_mean        | kg·N/ha     | mean nitrogen uptake of control                                   |
|                                         | nuc_sd          | -           | standard deviation of N uptake of control                         |

71



72 **Supplementary Table 4** Summary statistics of the nitrogen recovery efficiency in control and  
 73 treated plots, the N dose, soil properties and climate variables in the investigated sites of the  
 74 primary studies. For each variable, mean, standard deviation, minimum and maximum values  
 75 are given.

| <b>Variable</b>       | <b>Unit</b>         | <b>Mean</b> | <b>Standard deviation</b> | <b>Min</b> | <b>Max</b> |
|-----------------------|---------------------|-------------|---------------------------|------------|------------|
| <b>NUEr control</b>   | %                   | 33          | 15                        | 2          | 96         |
| <b>NUEr treatment</b> | %                   | 39          | 15                        | 4.2        | 98         |
| <b>N rate</b>         | kg ha <sup>-1</sup> | 173         | 65                        | 20         | 471        |
| <b>Clay</b>           | %                   | 28          | 6.5                       | 8.8        | 53         |
| <b>Soil pH</b>        | -                   | 7           | 0.9                       | 4.5        | 8.5        |
| <b>SOC</b>            | g kg <sup>-1</sup>  | 14          | 9.3                       | 2.7        | 80         |
| <b>MAP</b>            | mm                  | 963         | 446                       | 45         | 2330       |
| <b>MAT</b>            | °C                  | 14          | 5                         | -0.6       | 29         |

76 NUEr, nitrogen recovery efficiency; N rate, N application rate; Clay, soil clay content; SOC,  
 77 soil organic carbon; MAP, mean annual precipitation; and MAT, mean annual temperate.

78 **Supplementary Table 5** Relative and absolute changes in N recovery efficiency (NUEr) in  
 79 response to management practices (meta-analytical data vs. primary data) relative to a reference  
 80 practice (see Supplementary Table 2 for the control/reference situation for each practice).

| Management practice | Relative change in NUEr (%)<br>[mean (95% CI)] |                    | Absolute change in NUEr (%) [mean (95% CI)] |                       |                       |                       |
|---------------------|------------------------------------------------|--------------------|---------------------------------------------|-----------------------|-----------------------|-----------------------|
|                     | Meta-analytical data                           | Primary data       | Primary data                                |                       |                       |                       |
|                     | <i>ROM method</i>                              |                    | <i>ROM method</i>                           | <i>MD method</i>      | <i>SMD method</i>     |                       |
| Nutrient management | EE                                             | 14 (-14, 57)       | <b>31 (27, 34)</b>                          | <b>9.8 (8.6, 11)</b>  | <b>7.9 (6.9, 9)</b>   | <b>6.6 (5.7, 7.4)</b> |
|                     | CF                                             | 1.9 (-27, 33)      | <b>16 (10, 23)</b>                          | <b>5.9 (3.7, 8.1)</b> | <b>4.9 (3, 6.8)</b>   | <b>3.6 (2.4, 4.8)</b> |
|                     | OF                                             | -1.1 (-43, 71)     | -1.2 (-16, 14)                              | -0.5 (-6.1, 5.2)      | -0.9 (-4.7, 3)        | 0.5 (-2.7, 3.7)       |
|                     | RFP                                            | <b>28 (25, 31)</b> | <b>26 (17, 34)</b>                          | <b>7.3 (4.8, 9.8)</b> | <b>6.6 (3.8, 9.4)</b> | <b>5 (3.2, 6.9)</b>   |
|                     | RFR                                            | 17 (-18, 83)       | <b>39 (34, 45)</b>                          | <b>11 (9.9, 13)</b>   | <b>9.6 (8, 11.3)</b>  | <b>7.6 (6.5, 8.8)</b> |
|                     | RFT                                            | 6.7 (-18, 42)      | <b>24 (17, 31)</b>                          | <b>7 (4.9, 9.1)</b>   | <b>6.3 (4, 8.6)</b>   | <b>4.6 (3.3, 5.8)</b> |
| Crop management     | RES                                            | 6.9 (-1, 36)       | <b>24 (17, 32)</b>                          | <b>8 (5.6, 10)</b>    | <b>5.9 (3.7, 8)</b>   | <b>4.4 (2.8, 5.9)</b> |
|                     | CC                                             | -13 (-36, 19)      | <b>22 (6.6, 38)</b>                         | <b>8 (2.4, 14)</b>    | <b>5 (0.6, 9.5)</b>   | <b>4.9 (1.3, 8.6)</b> |
|                     | ROT                                            | <b>38 (38, 38)</b> | 16 (-10, 43)                                | 4 (-2.4, 10)          | 2.8 (-3.5, 9.1)       | 3.2 (-0.7, 7.1)       |
| Soil management     | ZT                                             | -2.3 (-17, 30)     | -4.1 (-12, 4.3)                             | -1.6 (-4.8, 1.7)      | -0.9 (-3.6, 1.8)      | -0.7 (-2.7, 1.2)      |
|                     | RT                                             | <b>-9 (-9, -9)</b> | 2.2 (-29, 34)                               | 0.8 (-11, 12.8)       | 0.9 (-6.9, 8.6)       | -0.1 (-5.5, 5.4)      |

81 EE: Enhanced efficiency fertilizer; CF: Combined fertilizer; OF: Organic fertilizer; RFP: Right  
 82 fertilizer placement; RFR: Right fertilizer rate; RFT: Right fertilizer timing; BC: Biochar; RES:  
 83 Residue retention; CC: Cover cropping; ROT: Crop rotation; RT: Reduced tillage; ZT: Zero  
 84 tillage. ROM, the log transformed ratio of means (Eq. 5); MD, the raw mean difference (Eq. 8);  
 85 SMD, the standardized mean difference (Eq. 10).

86 **Supplementary Table 6** Main factor analysis of the contribution of management practices and  
87 site conditions on the variation in N recovery efficiency (NUEr) based on the primary studies,  
88 as derived by three models (ROM, MD and SMD methods): CI stands for 95% confidence  
89 intervals. Effect of moderators were tested using ANOVA using linear contrasts between model  
90 coefficients as implemented by metafor R package. Confidence intervals were derived via (non-  
91 parametric) bootstrapping as implemented by metafor R package.

| <b>ROM</b>                   |                       |                           |                       |                          |                          |                |
|------------------------------|-----------------------|---------------------------|-----------------------|--------------------------|--------------------------|----------------|
| <b>Moderator</b>             | <b>Moderator name</b> | <b>Parameter estimate</b> | <b>Standard error</b> | <b>CI lower boundary</b> | <b>CI upper boundary</b> | <b>p value</b> |
| fertilizer_type              | enhanced              | 0.397                     | 0.015                 | 0.368                    | 0.427                    | 0              |
| fertilizer_type              | combined              | 0.195                     | 0.017                 | 0.161                    | 0.228                    | 0              |
| fertilizer_type              | organic               | 0.168                     | 0.018                 | 0.133                    | 0.202                    | 0              |
| fertilizer_type              | mineral               | 0.09                      | 0.015                 | 0.061                    | 0.119                    | 0              |
| fertilizer_strategy          | placement             | -0.03                     | 0.017                 | -0.063                   | 0.003                    | 0.074          |
| fertilizer_strategy          | rate                  | 0.331                     | 0.016                 | 0.3                      | 0.362                    | 0              |
| fertilizer_strategy          | timing                | 0.403                     | 0.016                 | 0.371                    | 0.436                    | 0              |
| fertilizer_strategy          | standard              | 0.185                     | 0.014                 | 0.158                    | 0.213                    | 0              |
| crop_residue                 | no                    | 0.221                     | 0.014                 | 0.194                    | 0.248                    | 0              |
| crop_residue                 | yes                   | 0.232                     | 0.017                 | 0.199                    | 0.266                    | 0              |
| cover_crop_and_crop_rotation | no                    | 0.219                     | 0.014                 | 0.192                    | 0.245                    | 0              |
| cover_crop_and_crop_rotation | yes                   | 0.305                     | 0.028                 | 0.251                    | 0.359                    | 0              |
| tillage                      | zero                  | 0.052                     | 0.02                  | 0.014                    | 0.091                    | 0.007          |
| tillage                      | reduced               | 0.159                     | 0.028                 | 0.104                    | 0.214                    | 0              |
| tillage                      | standard              | 0.232                     | 0.013                 | 0.206                    | 0.258                    | 0              |
| crop_type                    | wheat                 | 0.254                     | 0.014                 | 0.226                    | 0.282                    | 0              |
| crop_type                    | maize                 | 0.256                     | 0.015                 | 0.226                    | 0.286                    | 0              |
| crop_type                    | rice                  | 0.164                     | 0.014                 | 0.136                    | 0.192                    | 0              |
| N_dose_scaled                | intrcpt               | 0.226                     | 0.015                 | 0.197                    | 0.255                    | 0              |
| N_dose_scaled                | varsel                | -0.131                    | 0.001                 | -0.134                   | -0.129                   | 0              |
| clay_scaled                  | intrcpt               | 0.222                     | 0.013                 | 0.196                    | 0.249                    | 0              |
| clay_scaled                  | varsel                | -0.033                    | 0.009                 | -0.05                    | -0.016                   | 0              |
| pH_scaled                    | intrcpt               | 0.222                     | 0.013                 | 0.196                    | 0.249                    | 0              |
| pH_scaled                    | varsel                | 0.011                     | 0.009                 | -0.006                   | 0.028                    | 0.199          |
| SOC_scaled                   | intrcpt               | 0.222                     | 0.014                 | 0.195                    | 0.248                    | 0              |
| SOC_scaled                   | varsel                | 0.012                     | 0.007                 | -0.002                   | 0.025                    | 0.083          |
| MAP_scaled                   | intrcpt               | 0.222                     | 0.013                 | 0.196                    | 0.249                    | 0              |
| MAP_scaled                   | varsel                | 0.004                     | 0.011                 | -0.017                   | 0.026                    | 0.688          |
| MAT_scaled                   | intrcpt               | 0.222                     | 0.013                 | 0.195                    | 0.248                    | 0              |
| MAT_scaled                   | varsel                | -0.011                    | 0.011                 | -0.034                   | 0.011                    | 0.314          |
| <b>MD</b>                    |                       |                           |                       |                          |                          |                |

| <b>Moderator</b>             | <b>Moderator name</b> | <b>Parameter estimate</b> | <b>Standard error</b> | <b>CI lower boundary</b> | <b>CI upper boundary</b> | <b>p value</b> |
|------------------------------|-----------------------|---------------------------|-----------------------|--------------------------|--------------------------|----------------|
| fertilizer_type              | enhanced              | 9.076                     | 0.422                 | 8.25                     | 9.902                    | 0              |
| fertilizer_type              | combined              | 7.005                     | 0.488                 | 6.049                    | 7.961                    | 0              |
| fertilizer_type              | organic               | 3.539                     | 0.529                 | 2.501                    | 4.577                    | 0              |
| fertilizer_type              | mineral               | 4.475                     | 0.418                 | 3.656                    | 5.294                    | 0              |
| fertilizer_strategy          | placement             | 3.441                     | 0.473                 | 2.515                    | 4.368                    | 0              |
| fertilizer_strategy          | rate                  | 9.924                     | 0.474                 | 8.995                    | 10.854                   | 0              |
| fertilizer_strategy          | timing                | 8.366                     | 0.471                 | 7.443                    | 9.289                    | 0              |
| fertilizer_strategy          | standard              | 5.38                      | 0.408                 | 4.58                     | 6.18                     | 0              |
| crop_residue                 | no                    | 6.41                      | 0.408                 | 5.611                    | 7.21                     | 0              |
| crop_residue                 | yes                   | 6.908                     | 0.502                 | 5.925                    | 7.891                    | 0              |
| cover_crop_and_crop_rotation | no                    | 6.388                     | 0.409                 | 5.587                    | 7.189                    | 0              |
| cover_crop_and_crop_rotation | yes                   | 8.138                     | 0.645                 | 6.874                    | 9.401                    | 0              |
| tillage                      | zero                  | 2.091                     | 0.582                 | 0.951                    | 3.231                    | 0              |
| tillage                      | reduced               | 4.969                     | 0.97                  | 3.069                    | 6.87                     | 0              |
| tillage                      | standard              | 6.722                     | 0.401                 | 5.937                    | 7.507                    | 0              |
| crop_type                    | wheat                 | 8.55                      | 0.428                 | 7.711                    | 9.39                     | 0              |
| crop_type                    | maize                 | 6.659                     | 0.457                 | 5.763                    | 7.555                    | 0              |
| crop_type                    | rice                  | 4.643                     | 0.429                 | 3.803                    | 5.483                    | 0              |
| N_dose_scaled                | intrcpt               | 6.812                     | 0.451                 | 5.927                    | 7.697                    | 0              |
| N_dose_scaled                | varsel                | -4.711                    | 0.043                 | -4.795                   | -4.627                   | 0              |
| clay_scaled                  | intrcpt               | 6.47                      | 0.408                 | 5.671                    | 7.27                     | 0              |
| clay_scaled                  | varsel                | -1.424                    | 0.258                 | -1.93                    | -0.918                   | 0              |
| pH_scaled                    | intrcpt               | 6.461                     | 0.406                 | 5.665                    | 7.257                    | 0              |
| pH_scaled                    | varsel                | 0.1                       | 0.231                 | -0.353                   | 0.553                    | 0.666          |
| SOC_scaled                   | intrcpt               | 6.436                     | 0.407                 | 5.638                    | 7.233                    | 0              |
| SOC_scaled                   | varsel                | 0.747                     | 0.215                 | 0.325                    | 1.168                    | 0.001          |
| MAP_scaled                   | intrcpt               | 6.461                     | 0.407                 | 5.664                    | 7.258                    | 0              |
| MAP_scaled                   | varsel                | 0.064                     | 0.251                 | -0.428                   | 0.556                    | 0.8            |
| MAT_scaled                   | intrcpt               | 6.453                     | 0.406                 | 5.657                    | 7.248                    | 0              |
| MAT_scaled                   | varsel                | -0.237                    | 0.328                 | -0.879                   | 0.405                    | 0.47           |
| <b>SMD</b>                   |                       |                           |                       |                          |                          |                |
| <b>Moderator</b>             | <b>Moderator name</b> | <b>Parameter estimate</b> | <b>Standard error</b> | <b>CI lower boundary</b> | <b>CI upper boundary</b> | <b>p value</b> |
| fertilizer_type              | enhanced              | 1.369                     | 0.076                 | 1.22                     | 1.518                    | 0              |
| fertilizer_type              | combined              | 1.195                     | 0.105                 | 0.988                    | 1.401                    | 0              |
| fertilizer_type              | organic               | 0.455                     | 0.144                 | 0.173                    | 0.736                    | 0.002          |
| fertilizer_type              | mineral               | 0.925                     | 0.071                 | 0.786                    | 1.064                    | 0              |
| fertilizer_strategy          | placement             | 1.404                     | 0.133                 | 1.144                    | 1.665                    | 0              |
| fertilizer_strategy          | rate                  | 1.57                      | 0.089                 | 1.396                    | 1.744                    | 0              |

|                                  |          |        |       |        |       |       |
|----------------------------------|----------|--------|-------|--------|-------|-------|
| fertilizer_strategy              | timing   | 1.154  | 0.113 | 0.932  | 1.376 | 0     |
| fertilizer_strategy              | standard | 0.92   | 0.063 | 0.796  | 1.044 | 0     |
| crop_residue                     | no       | 1.102  | 0.062 | 0.981  | 1.223 | 0     |
| crop_residue                     | yes      | 1.119  | 0.115 | 0.894  | 1.343 | 0     |
| cover_crop_and_crop_r<br>otation | no       | 1.097  | 0.061 | 0.977  | 1.217 | 0     |
| cover_crop_and_crop_r<br>otation | yes      | 1.261  | 0.204 | 0.861  | 1.662 | 0     |
| tillage                          | zero     | 0.105  | 0.135 | -0.159 | 0.369 | 0.437 |
| tillage                          | reduced  | 0.654  | 0.195 | 0.272  | 1.035 | 0.001 |
| tillage                          | standard | 1.164  | 0.06  | 1.047  | 1.28  | 0     |
| crop_type                        | wheat    | 1.048  | 0.081 | 0.89   | 1.205 | 0     |
| crop_type                        | maize    | 1.111  | 0.083 | 0.948  | 1.273 | 0     |
| crop_type                        | rice     | 1.141  | 0.085 | 0.973  | 1.308 | 0     |
| N_dose_scaled                    | intrcpt  | 1.105  | 0.061 | 0.986  | 1.224 | 0     |
| N_dose_scaled                    | varsel   | -0.019 | 0.035 | -0.088 | 0.05  | 0.588 |
| clay_scaled                      | intrcpt  | 1.105  | 0.061 | 0.986  | 1.224 | 0     |
| clay_scaled                      | varsel   | -0.1   | 0.052 | -0.201 | 0.002 | 0.054 |
| pH_scaled                        | intrcpt  | 1.104  | 0.061 | 0.985  | 1.223 | 0     |
| pH_scaled                        | varsel   | 0.044  | 0.051 | -0.057 | 0.145 | 0.39  |
| SOC_scaled                       | intrcpt  | 1.103  | 0.061 | 0.984  | 1.223 | 0     |
| SOC_scaled                       | varsel   | 0.008  | 0.045 | -0.081 | 0.097 | 0.86  |
| MAP_scaled                       | intrcpt  | 1.104  | 0.061 | 0.985  | 1.222 | 0     |
| MAP_scaled                       | varsel   | -0.016 | 0.057 | -0.126 | 0.095 | 0.781 |
| MAT_scaled                       | intrcpt  | 1.102  | 0.061 | 0.983  | 1.22  | 0     |
| MAT_scaled                       | varsel   | -0.061 | 0.056 | -0.171 | 0.049 | 0.28  |

92 Scaled variables were converted to have unit variance. ROM, the log transformed ratio of means  
93 (Eq. 5); MD, the raw mean difference (Eq. 8); SMD, the standardized mean difference (Eq. 10).

94 **Supplementary Table 7** Parameter estimates for the contribution of management practices and  
 95 site conditions on the variation in NUEr based on the primary studies derived by three models  
 96 (ROM, MD and SMD methods) with corresponding standard errors, *p*-values and 95%  
 97 confidence intervals (CI). Asterisks indicate interactions. Effect of moderators were tested using  
 98 ANOVA using linear contrasts between model coefficients as implemented by metafor R  
 99 package. Confidence intervals were derived via (non-parametric) bootstrapping as implemented  
 100 by metafor R package.

| <b>ROM</b>                                                             |                    |                |                 |                   |                   |
|------------------------------------------------------------------------|--------------------|----------------|-----------------|-------------------|-------------------|
| <b>QE: 80253; Pseudo-R<sup>2</sup>: 0.57; <i>p</i> value &lt; 0.05</b> |                    |                |                 |                   |                   |
| Moderator                                                              | Parameter estimate | Standard error | <i>p</i> -value | CI lower boundary | CI upper boundary |
| fertilizer_type_enhanced                                               | 0.3495             | 0.0190         | <.0001          | 0.3122            | 0.3867            |
| fertilizer_type_combined                                               | 0.2129             | 0.0206         | <.0001          | 0.1725            | 0.2532            |
| fertilizer_type_organic                                                | 0.1771             | 0.0210         | <.0001          | 0.1359            | 0.2182            |
| fertilizer_type_mineral                                                | 0.0956             | 0.0195         | <.0001          | 0.0574            | 0.1338            |
| fertilizer_strategy_placement                                          | 0.1419             | 0.0182         | <.0001          | 0.1063            | 0.1774            |
| fertilizer_strategy_rate                                               | 0.1827             | 0.0115         | <.0001          | 0.1602            | 0.2053            |
| fertilizer_strategy_timing                                             | 0.2036             | 0.0137         | <.0001          | 0.1768            | 0.2304            |
| crop_residue_yes                                                       | 0.0725             | 0.0127         | <.0001          | 0.0477            | 0.0973            |
| cover_crop_and/or_crop_rotatio<br>n                                    | 0.1317             | 0.0265         | <.0001          | 0.0798            | 0.1836            |
| Tillage_zero/reduced till                                              | -0.0638            | 0.0144         | <.0001          | -0.0920           | -0.0357           |
| crop_type_wheat                                                        | -0.0353            | 0.0016         | <.0001          | -0.0385           | -0.0321           |
| crop_type_maize                                                        | -0.0049            | 0.0115         | 0.6676          | -0.0274           | 0.0175            |
| crop_type_rice                                                         | 0.0000             | 0.0000         | 0.0000          | 0.0000            | 0.0000            |
| N_scaled                                                               | -1.1786            | 0.0088         | <.0001          | -1.1957           | -1.1614           |
| Clay_scaled                                                            | -0.0706            | 0.0115         | <.0001          | -0.0930           | -0.0481           |
| SOC_scaled                                                             | 0.0626             | 0.0113         | <.0001          | 0.0406            | 0.0847            |
| pH_scaled                                                              | 0.0522             | 0.0142         | <.0001          | 0.0242            | 0.0801            |
| MAP_scaled                                                             | 0.1259             | 0.0191         | <.0001          | 0.0884            | 0.1634            |
| MAT_scaled                                                             | -0.0723            | 0.0176         | <.0001          | -0.1069           | -0.0378           |
| N_squared_scaled                                                       | 1.1200             | 0.0090         | <.0001          | 1.1024            | 1.1377            |
| Placement:maize                                                        | -0.3404            | 0.0211         | <.0001          | -0.3818           | -0.2991           |
| MAT_scaled:maize                                                       | 0.1322             | 0.0231         | <.0001          | 0.0869            | 0.1775            |
| N_scaled:SOC_scaled                                                    | 0.0627             | 0.0040         | <.0001          | 0.0548            | 0.0706            |
| <b>MD</b>                                                              |                    |                |                 |                   |                   |
| <b>QE: 63270; Pseudo-R<sup>2</sup>: 0.65; <i>p</i> value &lt; 0.05</b> |                    |                |                 |                   |                   |
| Moderator                                                              | Parameter estimate | Standard error | <i>p</i> -value | CI lower boundary | CI upper boundary |
| fertilizer_type_enhanced                                               | 8.0954             | 0.5367         | <.0001          | 7.0434            | 9.1473            |
| fertilizer_type_combined                                               | 7.5767             | 0.5854         | <.0001          | 6.4293            | 8.7242            |
| fertilizer_type_organic                                                | 3.7867             | 0.6204         | <.0001          | 2.5707            | 5.0027            |
| fertilizer_type_mineral                                                | 4.8150             | 0.5415         | <.0001          | 3.7536            | 5.8763            |
| fertilizer_strategy_placement                                          | 1.8479             | 0.5348         | <.0001          | 0.7998            | 2.8960            |
| fertilizer_strategy_rate                                               | 4.3411             | 0.3541         | <.0001          | 3.6470            | 5.0351            |
| fertilizer_strategy_timing                                             | 3.2728             | 0.3493         | <.0001          | 2.5882            | 3.9573            |
| crop_residue_yes                                                       | 1.8930             | 0.3415         | <.0001          | 1.2237            | 2.5623            |

| cover_crop_and/or_crop_rotatio<br>n                                                                                     | 1.5543             | 0.5517         | <.01    | 0.4730            | 2.6355            |
|-------------------------------------------------------------------------------------------------------------------------|--------------------|----------------|---------|-------------------|-------------------|
| Tillage_zero/reduced till                                                                                               | -2.8625            | 0.4299         | <.0001  | -3.7050           | -2.0199           |
| crop_type_wheat                                                                                                         | 0.1205             | 0.0633         | 0.0570  | -0.0036           | 0.2445            |
| crop_type_maize                                                                                                         | -0.7213            | 0.3158         | <.05    | -1.3403           | -0.1023           |
| crop_type_rice                                                                                                          | 0.0000             | 0.0000         | 0.0000  | 0.0000            | 0.0000            |
| N_scaled                                                                                                                | -30.1474           | 0.2784         | <.0001  | -30.6930          | -29.6018          |
| Clay_scaled                                                                                                             | -2.2753            | 0.3245         | <.0001  | -2.9113           | -1.6394           |
| SOC_scaled                                                                                                              | 1.1541             | 0.3561         | <.005   | 0.4561            | 1.8521            |
| pH_scaled                                                                                                               | 0.2732             | 0.3074         | 0.3742  | -0.3293           | 0.8757            |
| MAP_scaled                                                                                                              | 0.9656             | 0.3854         | <.05    | 0.2103            | 1.7209            |
| MAT_scaled                                                                                                              | -0.4163            | 0.4925         | 0.3979  | -1.3817           | 0.5490            |
| N_squared_scaled                                                                                                        | 27.9200            | 0.2822         | <.0001  | 27.3670           | 28.4731           |
| Placement:maize                                                                                                         | -3.0466            | 0.5610         | <.0001  | -4.1461           | -1.9471           |
| MAT_scaled:maize                                                                                                        | 2.3939             | 0.6452         | <.001   | 1.1294            | 3.6584            |
| N_scaled:SOC_scaled                                                                                                     | 0.4221             | 0.1229         | <.001   | 0.1812            | 0.6631            |
| <b>SMD</b> <span style="float: right;"><b>Q<sub>E</sub>: 6108; Pseudo-R<sup>2</sup>: 0.63; p value &lt; 0.05</b></span> |                    |                |         |                   |                   |
| Moderator                                                                                                               | Parameter estimate | Standard error | p-value | CI lower boundary | CI upper boundary |
| fertilizer_type_enhanced                                                                                                | 1.2334             | 0.1013         | <.0001  | 1.0349            | 1.4319            |
| fertilizer_type_combined                                                                                                | 1.0177             | 0.1230         | <.0001  | 0.7766            | 1.2587            |
| fertilizer_type_organic                                                                                                 | 0.2806             | 0.1583         | 0.0764  | -0.0297           | 0.5909            |
| fertilizer_type_mineral                                                                                                 | 0.4063             | 0.1183         | <.001   | 0.1744            | 0.6382            |
| fertilizer_strategy_placement                                                                                           | 0.9990             | 0.1583         | <.0001  | 0.6887            | 1.3093            |
| fertilizer_strategy_rate                                                                                                | 0.9923             | 0.0998         | <.0001  | 0.7967            | 1.1879            |
| fertilizer_strategy_timing                                                                                              | 0.6162             | 0.1253         | <.0001  | 0.3707            | 0.8618            |
| crop_residue_yes                                                                                                        | 0.3111             | 0.1154         | <.01    | 0.0850            | 0.5372            |
| cover_crop_and/or_crop_rotatio<br>n                                                                                     | 0.4683             | 0.2082         | <.05    | 0.0602            | 0.8764            |
| tillage:zero/reduced till                                                                                               | -0.4592            | 0.1193         | <.001   | -0.6929           | -0.2254           |
| crop_type_wheat                                                                                                         | -0.0199            | 0.1039         | 0.8484  | -0.2236           | 0.1838            |
| crop_type_maize                                                                                                         | 0.0563             | 0.1181         | 0.6332  | -0.1750           | 0.2877            |
| crop_type_rice                                                                                                          | 0.0000             | 0.0000         | 0.0000  | 0.0000            | 0.0000            |
| N_scaled                                                                                                                | -0.1746            | 0.1246         | 0.1611  | -0.4187           | 0.0696            |
| Clay_scaled                                                                                                             | -0.1196            | 0.0563         | <.05    | -0.2299           | -0.0093           |
| SOC_scaled                                                                                                              | -0.0032            | 0.0638         | 0.9594  | -0.1283           | 0.1218            |
| pH_scaled                                                                                                               | 0.0579             | 0.0809         | 0.4743  | -0.1007           | 0.2165            |
| MAP_scaled                                                                                                              | 0.1446             | 0.0912         | 0.1127  | -0.0341           | 0.3233            |
| MAT_scaled                                                                                                              | -0.1060            | 0.0782         | 0.1750  | -0.2592           | 0.0472            |
| N_squared_scaled                                                                                                        | 0.1757             | 0.1154         | 0.1278  | -0.0504           | 0.4018            |
| Placement:maize                                                                                                         | -0.7457            | 0.2588         | <.005   | -1.2530           | -0.2384           |
| MAT_scaled:maize                                                                                                        | 0.1425             | 0.1149         | 0.2147  | -0.0826           | 0.3676            |
| N_scaled:SOC_scaled                                                                                                     | -0.0208            | 0.0309         | 0.5006  | -0.0814           | 0.0397            |

101 Scaled variables were converted to have unit variance. ROM, the log transformed ratio of means  
102 (Eq. 5); MD, the raw mean difference (Eq. 8); SMD, the standardized mean difference (Eq. 10).

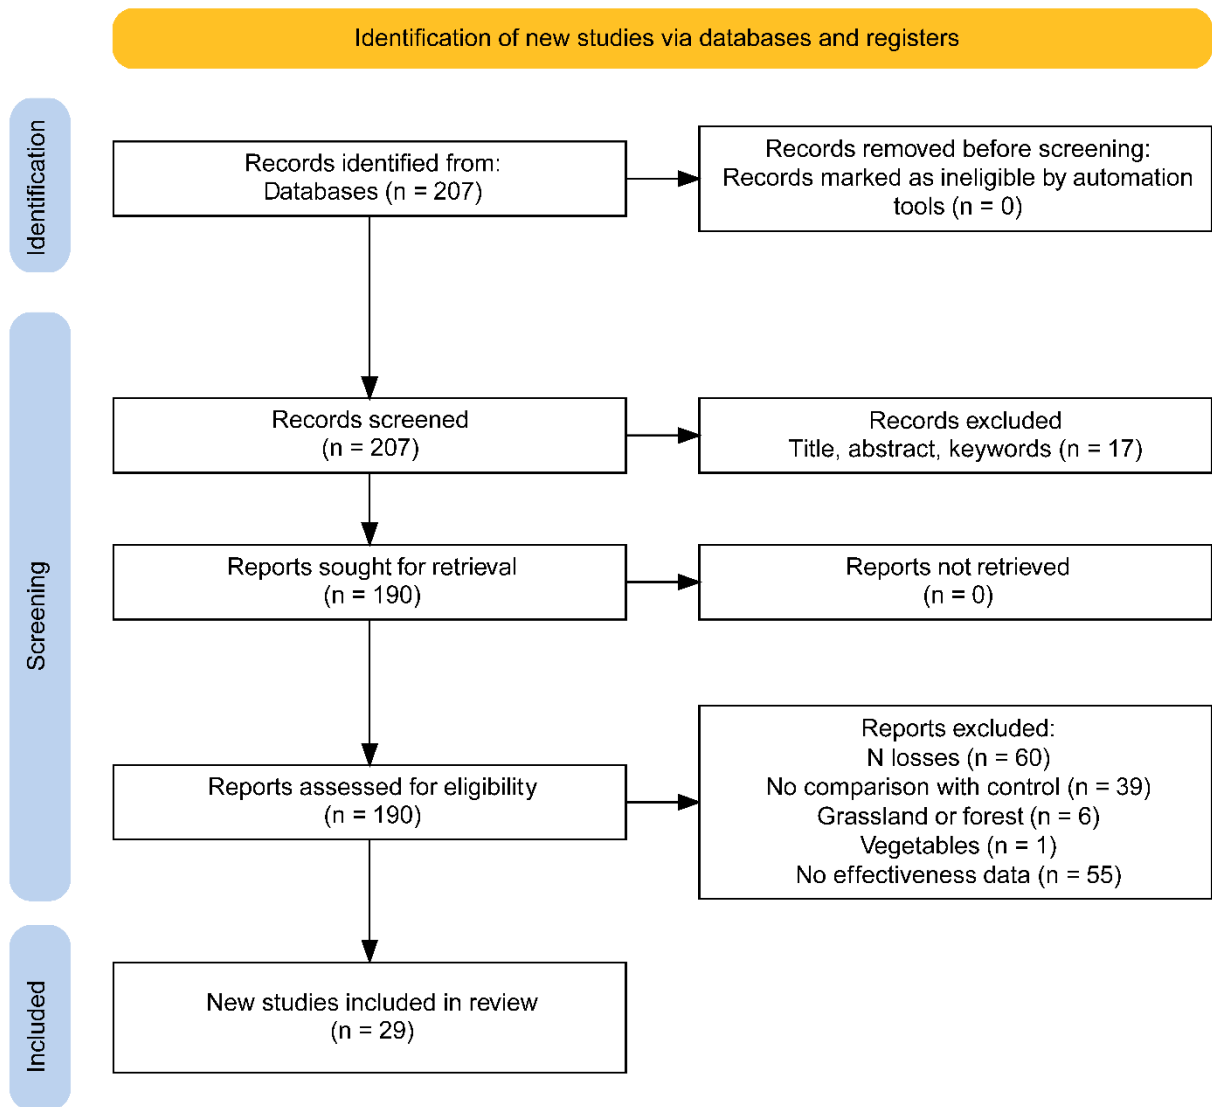

103

104 **Supplementary Fig. 1** PRISMA flow diagram showing the selection process of studies

105 included in the analysis.



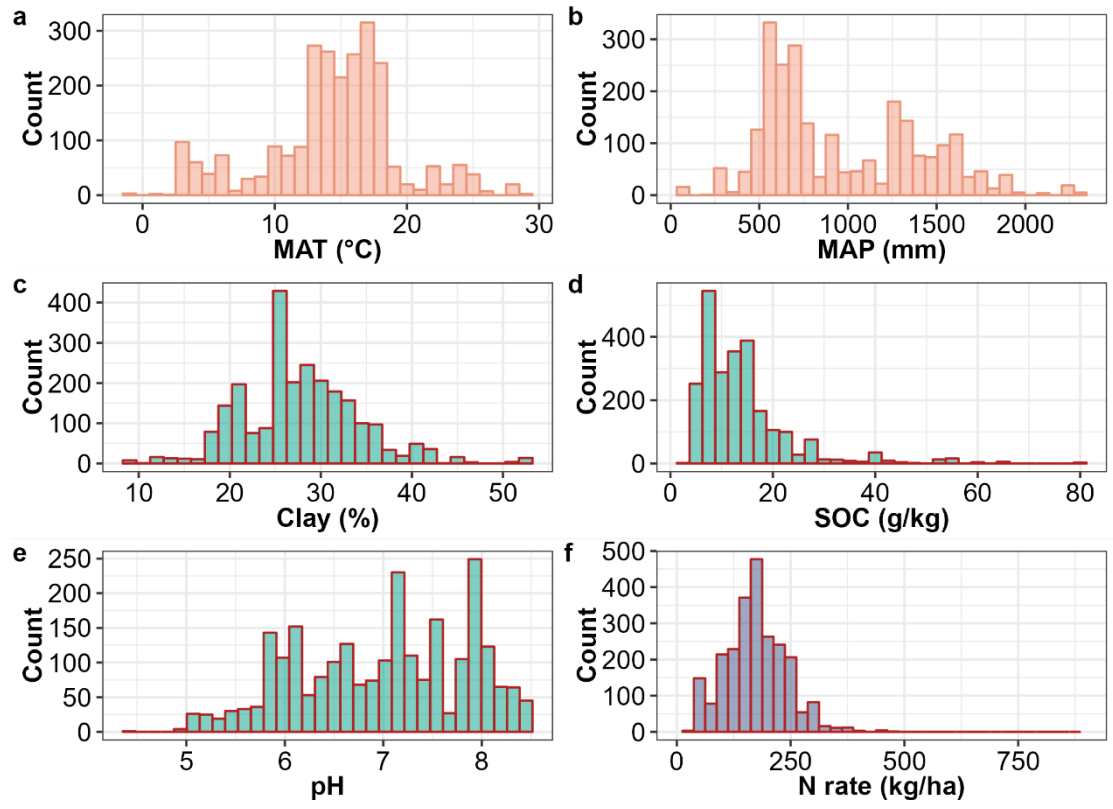

106

107 **Supplementary Fig. 2** Frequency distribution histogram of MAT (a), MAP (b), Clay  
 108 (c), SOC (d), pH (e), and N rate (f). MAT, mean annual temperate; MAP, mean annual  
 109 precipitation; Clay, soil clay content; SOC, soil organic carbon; pH, soil pH; and N rate,  
 110 N application rate. Source data are provided as a Source Data file.

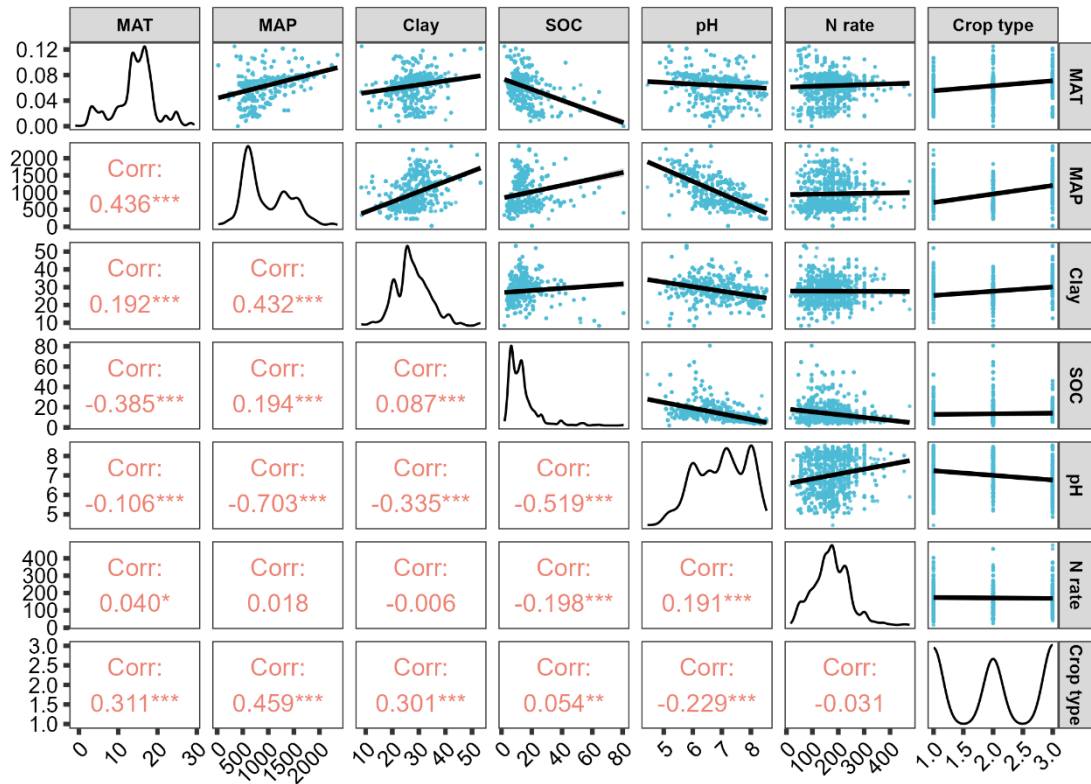

111

112 **Supplementary Fig. 3** Data fitting and correlation coefficients among MAT, MAP,  
 113 Clay, SOC, pH, N rate and crop type. Explanations of the variables can be found in  
 114 Table S3. MAT, mean annual temperate; MAP, mean annual precipitation; Clay, soil  
 115 clay content; SOC, soil organic carbon; pH, soil pH; and N rate, N application rate.  
 116 Source data are provided as a Source Data file.

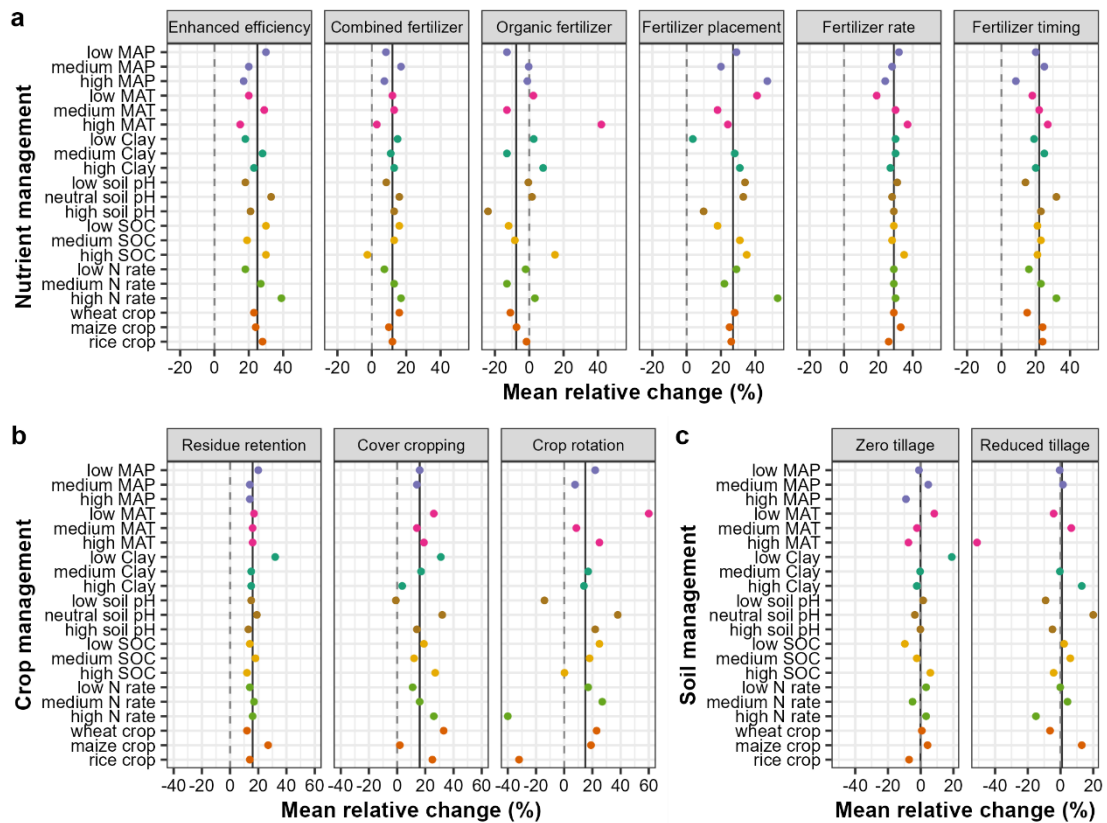

117

118 **Supplementary Fig. 4** Mean effects of nutrient (a), crop (b) and soil (c) management  
 119 practices, based on original source data of meta-analyses (circles), on the relative  
 120 change in N recovery efficiency (%) as affected by site conditions in comparison to the  
 121 overall mean impact (solid line). Dashed lines represent the zero effect, with the  
 122 difference between the dashed and solid lines indicating a negative or positive effect.  
 123 Means and standard deviations of effect sizes for the management practices were  
 124 weighted by the number of observations. Nutrient management includes enhanced  
 125 efficiency fertilizer, combined fertilizer, organic fertilizer, right fertilizer placement,  
 126 right fertilizer rate and right fertilizer timing. Crop management includes residue  
 127 retention, cover cropping and crop rotation. Soil management includes zero tillage and  
 128 reduced tillage. Source data are provided as a Source Data file.

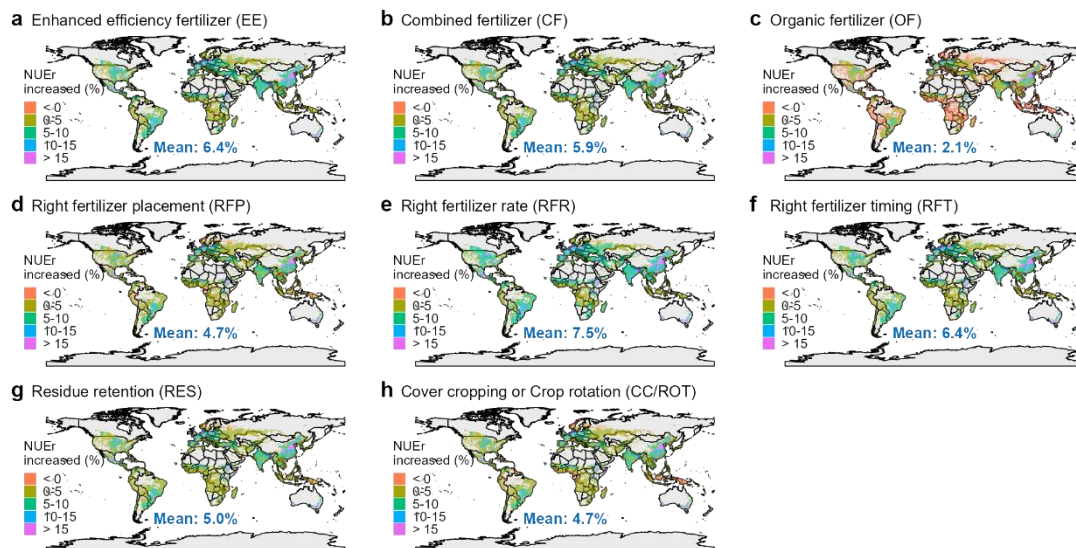

129

130 **Supplementary Fig. 5** Upscaled results for global impacts of management practices on  
 131 changes in absolute N recovery efficiency (%) based on the MD model. (a) EE,  
 132 enhanced efficiency fertilizer; (b) CF, combined fertilizer; (c) OF, organic fertilizer; (d)  
 133 RFP, Right fertilizer placement; (e) RFR, right fertilizer rate; (f) RFT, right fertilizer  
 134 timing; (g) RES, residue retention; and (h) CC/ROT, cover cropping or crop rotation.  
 135 Source data are provided as a Source Data file.
